# Supplementary material
Source: MDPI journal article supplement (https://www.mdpi.com/2078-1547/8/2/21)
Supplement: s1 [file s1]

Article

Supplementary Materials for “Precision of a streamlined life cycle assessment approach used in eco-rating of mobile phones”

Anders S. G. Andrae 1,* and Mikko Samuli Vaija 2

1 Huawei Technologies Sweden AB, Skalholtsgatan 9, 16494 Kista, Sweden;

2 Orange Labs, 4 Rue du Clos Courtel, 35510 Cesson-Sevigné, France;

***** Correspondence: anders.andrae@huawei.com; Tel.: +46-739-200-533; Fax: +46-812-060-800

Carbon footprint modeling in OLCA

Here is explained some details about the simplified GWP indicator (GWPI) intensity models used in OLCA.

1. Screen production

In 2016 mobile phones are mostly designed with two types of displays: TFT-LCD ~80 % and OLED ~20 % [1]. Less than 0.3 % of mobile phones still feature passive matrix LCD displays (PMLCD) [1]. TFT-LCD displays can be divided in three groups according to the type of material used for the thin-film-transistors (TFT): amorphous silicon (a-Si), low-temperature polycrystalline silicon (LTPS) and indium gallium zinc oxide (IGZO). Mobile phones equipped with OLED displays only rely on the active matrix technology (AMOLED) [2].

The model used for the OLCA method (EIME © “TFT LCD display panel, color; production mix, at plant; CN ©”) is based on the a-Si technology, which makes sense as this material represents ~66 % of 2016 TFT-LCD shipment [1**]**. A large share of mobile phones is also equipped with a touch-panel on the top of the display. For this sub-assembly the capacitive technology accounts for a major share owing to its high touch-sensitivity and its multi-touch capability. The model developed by CODDE Bureau Veritas (“Capacitive touchscreen LCD display panel; production mix, at plant; CN ©”) is based on this technology.

For all displays, touch-panel and screen models EIME © China were selected. Therefore the electricity mix used for these sub-assemblies production has a relatively high GWP indicator intensity. These LCI models were designed with data collected from mobile phones released in 2009—2010. Since then mobile phones have come to use larger displays and thinner panels, causing a decrease of the entire screen’s (display and touch-panel) mass density.

In order to improve the geographic distribution of the screen LCI models Orange carried out research on mobile phone display shipments by countries. Four main locations were identified: Japan (about 16 % of shipments), China (about 29 % of shipments), Chinese Taipei (about 15 % of shipments) and Korea (about 20 % of shipments). For the remaining 20 % websites of major manufacturers display manufacturers (AUO, BOE, CPT, Hannstar, Innolux, IVO, Japan Display, LG Display, Samsung Display, Sharp and Tianma - NLT Technologies) were checked in order to find information about the location the production plants. For example, AUO’s Fab L4B (manufacturing Gen 4.5 TFT-LCD LTPS) is located in Singapore and Samsung Display owns a production site in Vietnam. Thus 5 additional countries were identified. By combining the factory locations with the manufacturers’ market shares it was possible to allocate an average production share to each of these five countries. Production sites were identified in nine countries, with shipments share for each one.

Regarding the mass density issue a survey was conducted by Orange on 150 screens (LCD-TFT or AMOLED displays, combined with capacitive touch-panels). For each sub-assembly the total mass, screen area and the display technology were assessed. Figure S1 shows the results of this study.


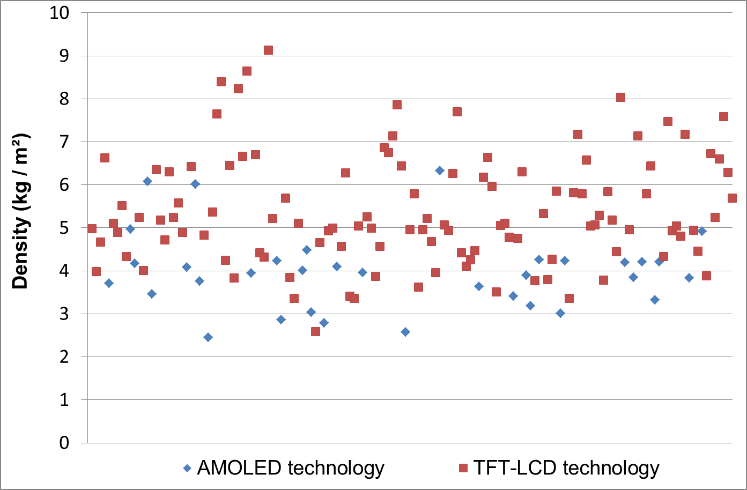


**Figure S1.** Mass density of the 150 screens sub-assemblies.

For screens based on AMOLED technology the average density is ≈3.95 kg/m². For the TFT-LCD based screens the average value is ≈5.11 kg/m². This higher density can be explained by the fact that TFT-LCD technology requires extra components, such as an LED backlight system.

Both studies (geographic distribution and density) were then submitted to CODDE Bureau Veritas in order to modify the LCI screen models. Hence for the modified TFT-LCD capacitive touch-panel model the GWPI score dropped from *I,ScreenA* = 487 g CO2—Equation/cm2 [3] previously used in eco-ratings to *I,ScreenA* = 261 g CO2—Equation/cm².

2. Integrated Circuit and other PCBA parts production

See section 2.6.1 in main paper

3. Rigid and flexible PCB production

For rigid PCBs, with one to 12 copper layers, models were selected directly from EIME © database. For rigid PCBs with more than 12 copper layers, a linear regression model was developed according to the layer count (Eqation S1).

|  | (S1) |
| --- | --- |

For flexible PCBs (*I,PCB,f,area* ) a specific model was developed in 2010 with CODDE Bureau Veritas: Printed Wire Board, PWB, Polyimide copper flexible, 2 layers; production mix, at plant; RER ©.

This model was designed on a 2 copper layers model base, as 87.5 % of the 32 analyzed flexible PCB were of this type. Data on flexible printed circuit boards design was retrieved on manufacturer’s websites, such as [4].

The following materials were considered:

- Substrate and cover material: 2 mils (i.e. 50 µm thick) polyimide, using EIME © “Polyimide (PI); production mix, at plant; without additives; US ©” model.
- Conductive layer material: 1 oz. (i.e. 35 µm thick) copper, using EIME © “Copper ingot (Cu); 15% recycled; production mix, at plant; RER ©”.
- Adhesive: modified epoxy resin with 1 % flame retardant weight content, using EIME © “Epoxy resin liquid; production mix, at plant; RER ©” and “Tetrabromobisphenol A (TBBA, C15H12Br402); brominated flame retardant; production mix, at plant; 2.12 g/cm3 density; US ©” models.

The considered manufacturing processes are detailed in Figure S2.


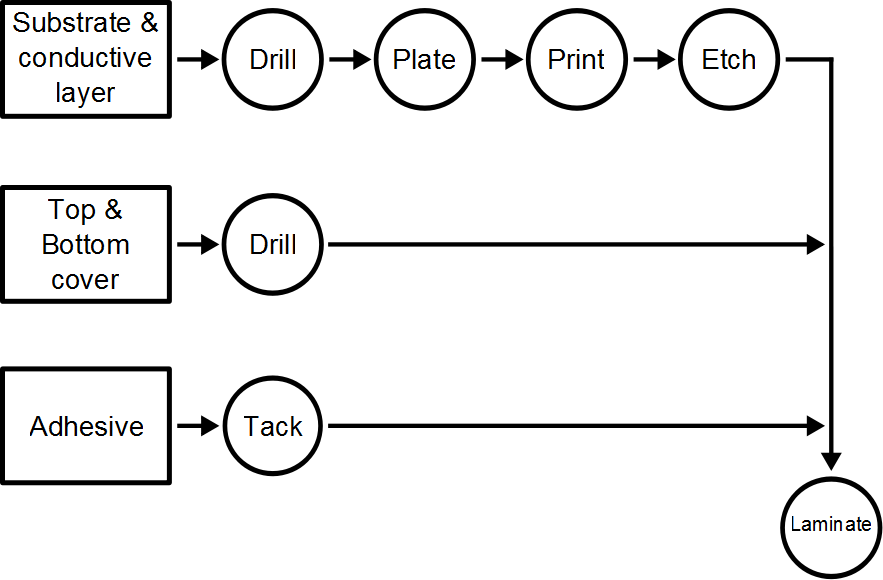


**Figure S2.** Processes for flexible printed circuit board manufacturing (adapted from Minco’s “Design Guidelines for Highly Reliable Flexible Printed Circuits Optimized for Manufacturability”).

These different processes were allocated to LCI models from EIME © database, such as:

- Material cleaning: Precleaning; for PWB production; technology mix, at plant; DE ©
- Drilling and copper plating: Throughole and copper paste deposition; for PWB production; technology mix, at plant; RER ©
- Printing and etching: Etching and stripping; for PWB production; technology mix, at plant; RER ©
- Laminating: Pressing multilayers; for PWB production; technology mix, at plant; RER ©

4. Camera production

See section 2.6.2 in main paper.

5. Plastics, Aluminium, Steel, and Battery production

For these three materials and this sub-assembly LCI models were selected directly from the EIME © database, on the basis of several mobile phone LCAs carried out by Orange in 2009—2011.

For plastics it was assumed that most of the parts are made of Acrylonitrile Butadiene Styrene (ABS) and Polycarbonate (PC), with an 80/20 mass ratio. The following EIME © models were considered for these materials:

- ABS: “Acrylonitrile Butadiene Styrene (ABS); from acrylonitrile, styrene and polybutadiene; production mix; RER ©”
- PC: “Polycarbonate (PC); from phosgene and bisphenol A; production mix, at plant; without additives; RER ©”

As most of the plastic parts (*I,Plast* ) in a mobile phone have a complex shape it was also assumed that they are manufactured with an injection moulding process. Therefore the EIME © model “Injection moulding of thermoplastics; technology mix, at plant; FR ©” was added for the plastics LCI modeling.

For aluminium (*I,Alu* ) only one model was chosen in the EIME © database (“Aluminium; 51% recycled; production mix; 68% from waste recycling and 32% from scrap recycling; RER ©”), as it was considered to be the closest one to the global average aluminium production. Two manufacturing processes were also taken into account (“Deep drawing of aluminium parts; for sheet metal; technology mix, at plant; NE ©” and “Sheet rolling of aluminium; technology mix, at plant; RER ©”). No CNC machining model was considered at this stage, as the high end mobile phone models featuring this type of casing were not numerous on the global market.

For steel parts (*I,Steel* ), in order to simplify the assessment, only one type of alloy was considered, the stainless one. In that way the “Steel stainless; 15% chromium content, primary production; production mix, at plant; RER ©” was selected in EIME © database. On the top of this material, LCI models of two manufacturing process were also included: “Deep drawing of steel parts; for sheet metal; technology mix, at plant; NE ©” and “Sheet rolling of aluminium; technology mix, at plant; RER ©” (EIME © database did not contain any steel sheet rolling model therefore the closest one was chosen).

Finally, the EIME© model “Li-ions battery; production mix, at plant; RER ©” was chosen for the battery production (*I,Batt )*. This sub-assembly’s modeling is currently one of the main flaws of the OLCA method. Indeed, the EIME © model is based on technology from 1997. Furthermore it is not possible to specify in the model if the battery features a hard case (plastic casing enclosing an aluminium can, which itself contains the anode/cathode/electrolyte system) or a soft case (in which cells are using a thin aluminized plastic as a bag, glued with different type of polymers for the tightness, also often called “lithium polymer”). For a laptop LCA conducted in 2014, Orange designed an LCI for a lithium-ion battery based on full Materials Declarations and Safety Material Data Sheets, but so far it has not been adapted to the OLCA method. Orange was involved in the battery Product Environmental Footprint Category Rules pilot study as expert in the panel review. Therefore the information used in that pilot could be used for this project’s case studies. Indeed the LCO (LiCoO2) chemistry, one of the most common for mobile phones batteries, was considered in this study.

6. Charger production

In 2009 Orange carried out a full LCA on a mobile phone including a specific study on the charger. The charger (mass 58.1 g) of this study was used to create the model (*I,Cha* ) displayed in Table S1.

**Table S1.** 2009 model for charger life cycle inventory.

According to this model the GWPI score is 647 g CO2 Equation It was assumed that the electronics of the charger are similar for every device, and that the changes in weight are due to changes in mass of the casing. In OLCA the charger footprint is assessed thanks to its total mass (provided by the manufacturer) by applying Equation S2.

|  | *(S2)* |
| --- | --- |

This charger model reflects the 2009 state-of-the-art for LCA at Orange. Compared to current knowledge it highly likely contains several flaws. For the connector on the PCB, the cable and the plug generic models from the EIME © database were used, instead of carrying out a disassembly for material and manufacturing process identification. For the transformer the model (“Standard transformer for PWB; production mix, at plant; RER ©”) is rather intended to be used for linear transformers than switch mode transformers. For the latter the “Switch Mode Transformer, SMT, low voltage; production mix, at plant; RER ©” model is more representative. Furthermore this charger model also features a proprietary connection system instead of a micro-B USB plug (universal charger is designed with this type of connector).

In 2016 Orange conducted three others LCAs for chargers (universal charger types). The GWPI scores for these chargers range from 730 g CO2—Equation to 810 g CO2—Equation, with about 35 % of the impact related to the cable (depending of its length and design, i.e. detachable or captive). As the 2009 model’s GWPI score was in the same order of magnitude as the three more recent models, the update of this sub-assembly was postponed in the OLCA method.

7. Other parts, Manual and Packaging materials production

For these miscellaneous parts production LCI models (*I,Oth* *I,Man* *I,Pack* ) were selected in EIME © database according to Bills of Materials obtained based on three mobile phone LCAs carried out by Orange. Hence the category “others parts” mainly consists of small mechanical parts made with materials such as stainless steel (EIME © model “Steel stainless; 15% chromium content, primary production; production mix, at plant; RER ©”) or PMMA (EIME © model “Polymethyl methacrylate (PMMA) sheet; production mix, at plant; RER ©”).

8. Distribution

The emission intensity and distance are chosen automatically in OLCA determined by manufacturing location and distribution market.

In OLCA method the GWPI score (*I,Dist* ) calculation is determined by three factors:

- Total mass of the product
- Transport mode (plane, cargo ship, train or truck)
- Distance

Product mass and transport mode are given by the manufacturer. For each transport mode a model have been selected in EIME © database.

For the distance, in order to simplify the data collection, five manufacturing locations and five distribution locations are pre-filled in the method. For all the 25 possible combinations the distances are calculated and are automatically applied for the GWPI score calculation.

For example if the “Asia (Shenzhen)” is selected as manufacturing location and “Europe (France”) as distribution location the distance is automatically set to 9520 km.

The OLCA method also features a “global” distribution option, based on an average distance of the 25 possible combinations.

9. Use stage

GWPI score related to use stage (*I,Use* ) is directly linked to the following parameters:

- Electrical energy required to charge the mobile phone’s battery
- Charger efficiency
- Number of chargings per year
- Years of use
- Electricity mix GWPI intensity (i.e. kg CO2—Equation per kWh)

In the OLCA method manufacturers are asked for data on the mobile phone battery’s voltage (Volts - V) and electric charge (milli-ampere hours - mAh). Energy losses, due to for example to Joule effect related to battery’s internal resistance or self-discharge phenomenon, are not considered in the method.

For the charger efficiency the current model is based on a single hypothesis, i.e. 65% efficiency (between mains and connector to mobile phone). This value was selected based on a GeSi survey [S5] which contains energy efficiency curves with variable loads for 65 the analyzed chargers. However, in [5] the different mobile phone charger’s efficiencies range from about 55% to a bit less than 80%. As the GWPI score related to the use stage energy consumption is directly correlated to the charging efficiency the next version of the OLCA method should include a question on the charger’s efficiency.

To determine the number of charges per year, OLCA uses a conservative hypothesis of one charge per day. Indeed in 2014, Orange carried out a smartphone LCA with a focus on the time spent by customers on various functions and applications (apps). For the studied device it was found that the batteries had to be recharged on average 60.7% each day (i.e. one charge every 1.65 days). Finally the factor “years of use” was set to two a value commonly used in mobile phone LCAs by Orange.

10. End-of-life

Regarding end-of-life management of mobiles phones (*I,EoLT* ) the OLCA method focus solely on devices recovered by the networks operator and which are intended to be handled for material recovery. Mobile phones sold on second hand market, directly or thanks to a refurbishment effort, are not considered in the scope of the present method.

Furthermore OLCA method does not consider one of the most common end-of-life scenarios for mobile phones: device is kept at home as a spare device. The OLCA method considers that 100% of the devices are recovered and handled as WEEE.

Orange’s mobile phones recovery system was used as a baseline to design the scenario:

- Devices are collected in the operator’s shops;
- Then they are shipped to a warehouse (distance assumption: 500 km by road);
- From the warehouse they are transported to a sorting center (distance assumption: 1000 km by road). In reality this sorting center is used for the refurbishment operation to supply the second-hand market, but these operations are not considered in this scenario);
- Finally from sorting center to specialized WEEE recycling facilities, such as Umicore in Belgium, Morphosis in France or Boliden in Sweden, where precious metals (e.g. silver, gold, platinum, palladium), secondary metals (e.g. antimony, tin, bismuth) or base metals (copper, nickel) can be recovered (distance assumption: 1500 km by road).

Therefore the total transport distance is considered to be 3000 km. EIME © model "Articulated lorry transport; Euro 0, 1, 2, 3, 4 mix; 40 t total weight, 27 t max payload; RER ©" is used for the GWPI score calculation.

EIME © model “Waste pretreatment of electrical and electronic equipment (WEEE); including dismantling and material separation; technology mix, at waste pretreatment plant; GLO ©” is applied for the entire mobile phone (i.e. including the battery) to account for the sorting effort.

At this step the battery is considered to be separated from the rest of the mobile phone, in order to be recycled for e.g. cobalt recovery. EIME © model “Waste treatment of Lithium-ion battery; by pyrometallurgical process; technology mix, at waste treatment plant; RER ©” is used to assess this step’s CO2—Equation emissions.

Finally, for the other parts recycling, a composite model based on EIME © model have been created. This model intends to assess the CO2—Equation emissions linked to pyrometallurgical treatment of an electronic device for material recovery. EIME © database 04_2015 contains models for material recovery for sub-assemblies such as printed circuit board assemblies (PCBA) but nothing for a complete product such as a mobile phone.

In order to depict the material composition of this type of device, Orange selected three mobile phones LCA and used EIME © “Bill of Materials – Product (BOM) ©”-tool to determine an average composition. Materials were grouped in different families (glass, plastics, metals, etc.) and waste incineration models were applied to each family to model the pyrometallurgical treatment’s GWPI score. For example, for plastics the “Waste incineration of plastics (PET, PMMA, PC); average European waste-to-energy plant, without collection, transport and pre-treatment; at plant; EU-27 ©” was selected, for glass model “Waste incineration of glass/inert material; average European waste-to-energy plant, without collection, transport and pre-treatment; at plant; EU-27” was picked.

The OLCA end-of-life scenario does not consider the additional recycling steps that occur after the pyrometallurgical treatment (i.e. hydrometallurgical and electrochemical treatment required to purify the recovered metals to a purity level above 99%).

A future development would be to start a partnership with e.g. Morphosis and use their LCA data [6] to refine the pyrometallurgical treatment GWPI score and implement the missing hydrometallurgical and electrochemical treatment steps.

References

1. IHS. Results based on IHS Markit, Technology Group, Small Medium Display Market Tracker, April 2017. Results are not an endorsement of Orange Lab Networks. Any reliance on these results is at the third party's own risk. Visit technology.ihs.com for more details. Available at: https://technology.ihs.com/589552/small-medium-display-market-tracker-q1-2017 (accessed on 5 June 2017).
2. Amasawa, E.; Ihara, T.; Ohta, T.; Hanaki, K. Life cycle assessment of organic light emitting diode display as emerging materials and technology. *J. Clean. Product.* **2016**, *135*, 1340–1350, doi:10.1016/j.jclepro.2016.07.025.
3. Andrae, A.S.G.; Vaija, M.S. To which degree does sector specific standardization make life cycle assessments comparable?—The case of global warming potential of smartphones. *Challenges* **2014**, *5*, 409–429, doi:10.3390/challe5020409. Available online: http://www.mdpi.com/2078-1547/5/2/409/htm (accessed on 17 May 2017).
4. Minco. Design Guidelines for Highly Reliable Flexible Printed Circuits Optimized for Manufacturability. Available online: http://www.minco.com/ResourceCenter/ProductGuides (accessed on 5 June 2017).
5. GeSI. An Energy aware Survey on Mobile Phone Chargers, 2011. Available online: http://gesi.org/files/Reports/An%20Energy-Aware%20Survey%20of%20Mobile%20Phone%20Chargers.pdf (accessed on 5 June 2017).
6. Morphosis. Analyse cycle de vie. Available online: https://www.morphosis.fr/page/analyse-cycle-de-vie.html (accessed on 5 June 2017).

© 2017 by the authors; licensee MDPI, Basel, Switzerland. This article is an open access article distributed under the terms and conditions of the Creative Commons by Attribution (CC-BY) license (http://creativecommons.org/licenses/by/4.0/).
